# Supplementary material
Source: publisher figshare collection journal article supplement (https://gsajournals.figshare.com/ndownloader/files/14831852)
Supplement: Supplementary file 1 [file 14831852]

## Sheet: Explanation
Table S7
This table shows the approximate proportion of cases where the genotype fitness matrix F was singular, both for the Random (PropFSingular_RandomExperiment) and the Fixed (PropFSingular_FixedExperiment) experiment.
However, all settings of all experiments were repeated until the target number of repetitions was reached (i.e. if the target number was 10000 repetitions for a specific setting,
then it was repeated until 10000 cases with nonsingular F were reached, while the excess cases with singular F were discarded).
We analysed the approximate proportion of cases where F is singular for all settings and both experiments (see the next two sheets),
but added the cases "number initial alleles = 10" and "number initial alleles = 25" while omitting the cases "number initial alleles = 500" and "number initial alleles = 1000".
This was done as the analysis showed that cases where F was singular became less frequent with higher numbers of initial alleles, while the computation time increased exponentially with the number of alleles,
so that it was increasingly unlikely to even find a single occurrence where F is singular for the number of repetitions tested.
Notably, not a single case where F was singular occurred for any setting with "number initial alleles = 25".
We also differentiated between cases where the singularity of F was caused by two identical alleles (this was only possible in the Random Experiment,
as the method of allele generation in the Fixed Experiment did not allow for identical alleles), or caused by linear dependencies between the rows of F without the presence of two identical alleles.
The latter is even rarer than the case with two identical alleles, and only occurred in a single setting in both experiments, with a frequency < 0.02%, respectively.

## Sheet: PropFSingular_RandomExperiment
Setting					DAA model					AO model
Max. intr. merit	Min. intr. merit	Range intr. merit	Multiplier f	Num. alleles init.	Number rep. F nonsingular	Number rep. F singular	Proportion rep. F singular	Number rep. F singular since 2 alleles equal	Number rep. F singular but no 2 alleles equal	Number rep. F nonsingular	Number rep. F singular	Proportion rep. F singular	Number rep. F singular since 2 alleles equal	Number rep. F singular but no 2 alleles equal
0.1	0	0.1	2	10	99981	19	0.00019	19	0	100000	0	0	0	0
0.1	0	0.1	2	25	24999	1	4e-05	1	0	25000	0	0	0	0
0.1	0	0.1	2	50	10000	0	0	0	0	10000	0	0	0	0
0.1	0	0.1	2	100	2000	0	0	0	0	2000	0	0	0	0
0.1	0	0.1	2	250	500	0	0	0	0	500	0	0	0	0
0.1	0	0.1	10	10	100000	0	0	0	0	100000	0	0	0	0
0.1	0	0.1	10	25	25000	0	0	0	0	25000	0	0	0	0
0.1	0	0.1	10	50	10000	0	0	0	0	10000	0	0	0	0
0.1	0	0.1	10	100	2000	0	0	0	0	2000	0	0	0	0
0.1	0	0.1	10	250	500	0	0	0	0	500	0	0	0	0
0.55	0.45	0.1	2	10	100000	0	0	0	0	100000	0	0	0	0
0.55	0.45	0.1	2	25	25000	0	0	0	0	25000	0	0	0	0
0.55	0.45	0.1	2	50	10000	0	0	0	0	10000	0	0	0	0
0.55	0.45	0.1	2	100	2000	0	0	0	0	2000	0	0	0	0
0.55	0.45	0.1	2	250	500	0	0	0	0	500	0	0	0	0
0.55	0.45	0.1	10	10	100000	0	0	0	0	100000	0	0	0	0
0.55	0.45	0.1	10	25	25000	0	0	0	0	25000	0	0	0	0
0.55	0.45	0.1	10	50	10000	0	0	0	0	10000	0	0	0	0
0.55	0.45	0.1	10	100	2000	0	0	0	0	2000	0	0	0	0
0.55	0.45	0.1	10	250	500	0	0	0	0	500	0	0	0	0
0.6	0.2	0.4	2	10	100000	0	0	0	0	100000	0	0	0	0
0.6	0.2	0.4	2	25	25000	0	0	0	0	25000	0	0	0	0
0.6	0.2	0.4	2	50	10000	0	0	0	0	10000	0	0	0	0
0.6	0.2	0.4	2	100	2000	0	0	0	0	2000	0	0	0	0
0.6	0.2	0.4	2	250	500	0	0	0	0	500	0	0	0	0
0.6	0.2	0.4	10	10	100000	0	0	0	0	100000	0	0	0	0
0.6	0.2	0.4	10	25	25000	0	0	0	0	25000	0	0	0	0
0.6	0.2	0.4	10	50	10000	0	0	0	0	10000	0	0	0	0
0.6	0.2	0.4	10	100	2000	0	0	0	0	2000	0	0	0	0
0.6	0.2	0.4	10	250	500	0	0	0	0	500	0	0	0	0
0.7	0.3	0.4	2	10	100000	0	0	0	0	100000	0	0	0	0
0.7	0.3	0.4	2	25	25000	0	0	0	0	25000	0	0	0	0
0.7	0.3	0.4	2	50	10000	0	0	0	0	10000	0	0	0	0
0.7	0.3	0.4	2	100	2000	0	0	0	0	2000	0	0	0	0
0.7	0.3	0.4	2	250	500	0	0	0	0	500	0	0	0	0
0.7	0.3	0.4	10	10	100000	0	0	0	0	100000	0	0	0	0
0.7	0.3	0.4	10	25	25000	0	0	0	0	25000	0	0	0	0
0.7	0.3	0.4	10	50	10000	0	0	0	0	10000	0	0	0	0
0.7	0.3	0.4	10	100	2000	0	0	0	0	2000	0	0	0	0
0.7	0.3	0.4	10	250	500	0	0	0	0	500	0	0	0	0
0.8	0.4	0.4	2	10	100000	0	0	0	0	100000	0	0	0	0
0.8	0.4	0.4	2	25	25000	0	0	0	0	25000	0	0	0	0
0.8	0.4	0.4	2	50	10000	0	0	0	0	10000	0	0	0	0
0.8	0.4	0.4	2	100	2000	0	0	0	0	2000	0	0	0	0
0.8	0.4	0.4	2	250	500	0	0	0	0	500	0	0	0	0
0.8	0.4	0.4	10	10	100000	0	0	0	0	100000	0	0	0	0
0.8	0.4	0.4	10	25	25000	0	0	0	0	25000	0	0	0	0
0.8	0.4	0.4	10	50	10000	0	0	0	0	10000	0	0	0	0
0.8	0.4	0.4	10	100	2000	0	0	0	0	2000	0	0	0	0
0.8	0.4	0.4	10	250	500	0	0	0	0	500	0	0	0	0
0.9	0.1	0.8	2	10	99997	3	3e-05	3	0	100000	0	0	0	0
0.9	0.1	0.8	2	25	25000	0	0	0	0	25000	0	0	0	0
0.9	0.1	0.8	2	50	10000	0	0	0	0	10000	0	0	0	0
0.9	0.1	0.8	2	100	2000	0	0	0	0	2000	0	0	0	0
0.9	0.1	0.8	2	250	500	0	0	0	0	500	0	0	0	0
0.9	0.1	0.8	10	10	100000	0	0	0	0	100000	0	0	0	0
0.9	0.1	0.8	10	25	25000	0	0	0	0	25000	0	0	0	0
0.9	0.1	0.8	10	50	10000	0	0	0	0	10000	0	0	0	0
0.9	0.1	0.8	10	100	2000	0	0	0	0	2000	0	0	0	0
0.9	0.1	0.8	10	250	500	0	0	0	0	500	0	0	0	0
1	0	1	2	10	99431	569	0.00569	559	10	100000	0	0	0	0
1	0	1	2	25	24955	45	0.0018	45	0	25000	0	0	0	0
1	0	1	2	50	9993	7	0.0007	7	0	10000	0	0	0	0
1	0	1	2	100	1999	1	0.0005	1	0	2000	0	0	0	0
1	0	1	2	250	500	0	0	0	0	500	0	0	0	0
1	0	1	10	10	100000	0	0	0	0	100000	0	0	0	0
1	0	1	10	25	25000	0	0	0	0	25000	0	0	0	0
1	0	1	10	50	10000	0	0	0	0	10000	0	0	0	0
1	0	1	10	100	2000	0	0	0	0	2000	0	0	0	0
1	0	1	10	250	500	0	0	0	0	500	0	0	0	0
1	0.9	0.1	2	10	99979	21	0.00021	21	0	100000	0	0	0	0
1	0.9	0.1	2	25	25000	0	0	0	0	25000	0	0	0	0
1	0.9	0.1	2	50	10000	0	0	0	0	10000	0	0	0	0
1	0.9	0.1	2	100	2000	0	0	0	0	2000	0	0	0	0
1	0.9	0.1	2	250	500	0	0	0	0	500	0	0	0	0
1	0.9	0.1	10	10	100000	0	0	0	0	100000	0	0	0	0
1	0.9	0.1	10	25	25000	0	0	0	0	25000	0	0	0	0
1	0.9	0.1	10	50	10000	0	0	0	0	10000	0	0	0	0
1	0.9	0.1	10	100	2000	0	0	0	0	2000	0	0	0	0
1	0.9	0.1	10	250	500	0	0	0	0	500	0	0	0	0

## Sheet: PropFSingular_FixedExperiment
Setting					DAA model					AO model
Max. intr. merit	Min. intr. merit	Range intr. merit	Multiplier f	Num. alleles init.	Number rep. F nonsingular	Number rep. F singular	Proportion rep. F singular	Number rep. F singular since 2 alleles equal	Number rep. F singular but no 2 alleles equal	Number rep. F nonsingular	Number rep. F singular	Proportion rep. F singular	Number rep. F singular since 2 alleles equal	Number rep. F singular but no 2 alleles equal
0.1	0	0.1	2	10	100000	0	0	0	0	1	0	0	0	0
0.1	0	0.1	2	25	25000	0	0	0	0	1	0	0	0	0
0.1	0	0.1	2	50	10000	0	0	0	0	1	0	0	0	0
0.1	0	0.1	2	100	2000	0	0	0	0	1	0	0	0	0
0.1	0	0.1	2	250	500	0	0	0	0	1	0	0	0	0
0.1	0	0.1	10	10	100000	0	0	0	0	1	0	0	0	0
0.1	0	0.1	10	25	25000	0	0	0	0	1	0	0	0	0
0.1	0	0.1	10	50	10000	0	0	0	0	1	0	0	0	0
0.1	0	0.1	10	100	2000	0	0	0	0	1	0	0	0	0
0.1	0	0.1	10	250	500	0	0	0	0	1	0	0	0	0
0.55	0.45	0.1	2	10	100000	0	0	0	0	1	0	0	0	0
0.55	0.45	0.1	2	25	25000	0	0	0	0	1	0	0	0	0
0.55	0.45	0.1	2	50	10000	0	0	0	0	1	0	0	0	0
0.55	0.45	0.1	2	100	2000	0	0	0	0	1	0	0	0	0
0.55	0.45	0.1	2	250	500	0	0	0	0	1	0	0	0	0
0.55	0.45	0.1	10	10	100000	0	0	0	0	1	0	0	0	0
0.55	0.45	0.1	10	25	25000	0	0	0	0	1	0	0	0	0
0.55	0.45	0.1	10	50	10000	0	0	0	0	1	0	0	0	0
0.55	0.45	0.1	10	100	2000	0	0	0	0	1	0	0	0	0
0.55	0.45	0.1	10	250	500	0	0	0	0	1	0	0	0	0
0.6	0.2	0.4	2	10	100000	0	0	0	0	1	0	0	0	0
0.6	0.2	0.4	2	25	25000	0	0	0	0	1	0	0	0	0
0.6	0.2	0.4	2	50	10000	0	0	0	0	1	0	0	0	0
0.6	0.2	0.4	2	100	2000	0	0	0	0	1	0	0	0	0
0.6	0.2	0.4	2	250	500	0	0	0	0	1	0	0	0	0
0.6	0.2	0.4	10	10	100000	0	0	0	0	1	0	0	0	0
0.6	0.2	0.4	10	25	25000	0	0	0	0	1	0	0	0	0
0.6	0.2	0.4	10	50	10000	0	0	0	0	1	0	0	0	0
0.6	0.2	0.4	10	100	2000	0	0	0	0	1	0	0	0	0
0.6	0.2	0.4	10	250	500	0	0	0	0	1	0	0	0	0
0.7	0.3	0.4	2	10	100000	0	0	0	0	1	0	0	0	0
0.7	0.3	0.4	2	25	25000	0	0	0	0	1	0	0	0	0
0.7	0.3	0.4	2	50	10000	0	0	0	0	1	0	0	0	0
0.7	0.3	0.4	2	100	2000	0	0	0	0	1	0	0	0	0
0.7	0.3	0.4	2	250	500	0	0	0	0	1	0	0	0	0
0.7	0.3	0.4	10	10	100000	0	0	0	0	1	0	0	0	0
0.7	0.3	0.4	10	25	25000	0	0	0	0	1	0	0	0	0
0.7	0.3	0.4	10	50	10000	0	0	0	0	1	0	0	0	0
0.7	0.3	0.4	10	100	2000	0	0	0	0	1	0	0	0	0
0.7	0.3	0.4	10	250	500	0	0	0	0	1	0	0	0	0
0.8	0.4	0.4	2	10	100000	0	0	0	0	1	0	0	0	0
0.8	0.4	0.4	2	25	25000	0	0	0	0	1	0	0	0	0
0.8	0.4	0.4	2	50	10000	0	0	0	0	1	0	0	0	0
0.8	0.4	0.4	2	100	2000	0	0	0	0	1	0	0	0	0
0.8	0.4	0.4	2	250	500	0	0	0	0	1	0	0	0	0
0.8	0.4	0.4	10	10	100000	0	0	0	0	1	0	0	0	0
0.8	0.4	0.4	10	25	25000	0	0	0	0	1	0	0	0	0
0.8	0.4	0.4	10	50	10000	0	0	0	0	1	0	0	0	0
0.8	0.4	0.4	10	100	2000	0	0	0	0	1	0	0	0	0
0.8	0.4	0.4	10	250	500	0	0	0	0	1	0	0	0	0
0.9	0.1	0.8	2	10	100000	0	0	0	0	1	0	0	0	0
0.9	0.1	0.8	2	25	25000	0	0	0	0	1	0	0	0	0
0.9	0.1	0.8	2	50	10000	0	0	0	0	1	0	0	0	0
0.9	0.1	0.8	2	100	2000	0	0	0	0	1	0	0	0	0
0.9	0.1	0.8	2	250	500	0	0	0	0	1	0	0	0	0
0.9	0.1	0.8	10	10	100000	0	0	0	0	1	0	0	0	0
0.9	0.1	0.8	10	25	25000	0	0	0	0	1	0	0	0	0
0.9	0.1	0.8	10	50	10000	0	0	0	0	1	0	0	0	0
0.9	0.1	0.8	10	100	2000	0	0	0	0	1	0	0	0	0
0.9	0.1	0.8	10	250	500	0	0	0	0	1	0	0	0	0
1	0	1	2	10	99986	14	0.00014	0	14	1	0	0	0	0
1	0	1	2	25	25000	0	0	0	0	1	0	0	0	0
1	0	1	2	50	10000	0	0	0	0	1	0	0	0	0
1	0	1	2	100	2000	0	0	0	0	1	0	0	0	0
1	0	1	2	250	500	0	0	0	0	1	0	0	0	0
1	0	1	10	10	100000	0	0	0	0	1	0	0	0	0
1	0	1	10	25	25000	0	0	0	0	1	0	0	0	0
1	0	1	10	50	10000	0	0	0	0	1	0	0	0	0
1	0	1	10	100	2000	0	0	0	0	1	0	0	0	0
1	0	1	10	250	500	0	0	0	0	1	0	0	0	0
1	0.9	0.1	2	10	100000	0	0	0	0	1	0	0	0	0
1	0.9	0.1	2	25	25000	0	0	0	0	1	0	0	0	0
1	0.9	0.1	2	50	10000	0	0	0	0	1	0	0	0	0
1	0.9	0.1	2	100	2000	0	0	0	0	1	0	0	0	0
1	0.9	0.1	2	250	500	0	0	0	0	1	0	0	0	0
1	0.9	0.1	10	10	100000	0	0	0	0	1	0	0	0	0
1	0.9	0.1	10	25	25000	0	0	0	0	1	0	0	0	0
1	0.9	0.1	10	50	10000	0	0	0	0	1	0	0	0	0
1	0.9	0.1	10	100	2000	0	0	0	0	1	0	0	0	0
1	0.9	0.1	10	250	500	0	0	0	0	1	0	0	0	0
